# Supplementary material for: A method for detecting single mRNA molecules in Arabidopsis thaliana
Source: PubMed Central journal article supplement (PMC5192599; doi:10.1186/s13007-016-0114-x), 2016-08-05
Supplement: 13007_2016_114_MOESM1_ESM.pdf [file 13007_2016_114_MOESM1_ESM.pdf]

570nm

670nm

DAPI

**a**

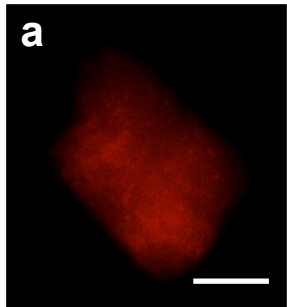

**b**

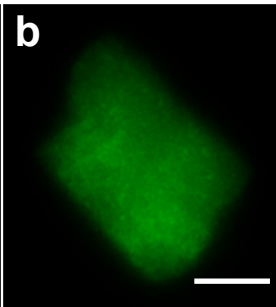

**c**

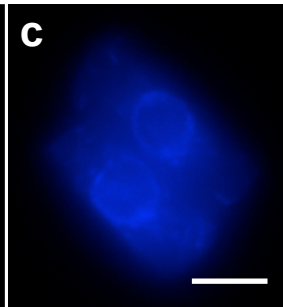

**d**

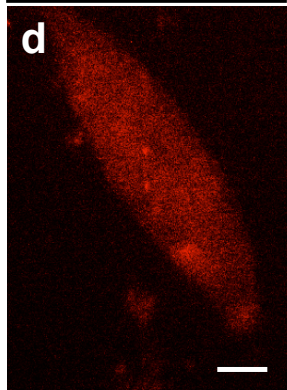

**e**

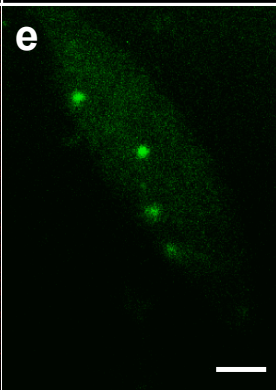

**f**

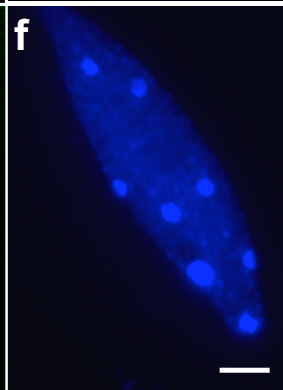

No probe control
