# Supplementary material for: A method for detecting single mRNA molecules in Arabidopsis thaliana
Source: PubMed Central journal article supplement (PMC5192599; doi:10.1186/s13007-016-0114-x), 2016-08-05

**a****Merge**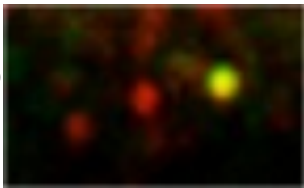**Quasar 570**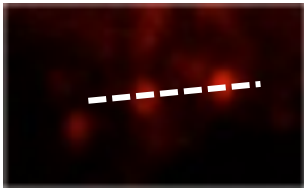**Quasar 670**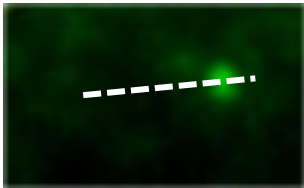**b**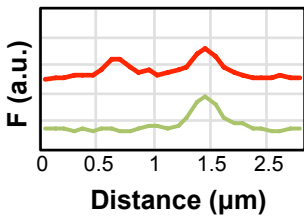

Supplement: 13007_2016_114_MOESM2_ESM.pdf [file 13007_2016_114_MOESM2_ESM.pdf]
