# Supplementary material for: A method for detecting single mRNA molecules in Arabidopsis thaliana
Source: PubMed Central journal article supplement (PMC5192599; doi:10.1186/s13007-016-0114-x), 2016-08-05

**RNase treated**

***PP2A* mRNA**

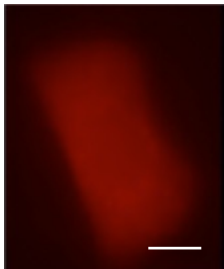

***PP2A* mRNA  
and DAPI**

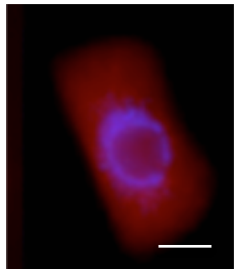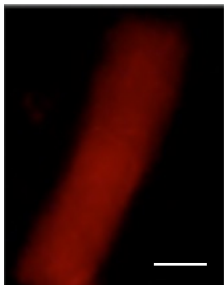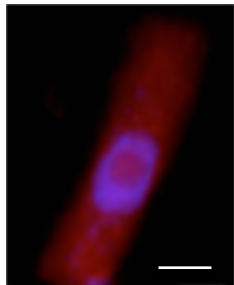

Supplement: 13007_2016_114_MOESM3_ESM.pdf [file 13007_2016_114_MOESM3_ESM.pdf]
